# Supplementary material for: Rho-dependent transcription termination proceeds via three routes
Source: PubMed Central journal article supplement (PMC8964686; doi:10.1038/s41467-022-29321-5), 2022-03-29
Supplement: 41467_2022_29321_MOESM1_ESM.pdf [file 41467_2022_29321_MOESM1_ESM.pdf]

## Supplementary Information

# Rho-dependent transcription termination proceeds via three routes

Eunho Song<sup>1</sup>, Heesoo Uhm<sup>1,4</sup>, Palinda Ruwan Munasingha<sup>2</sup>, Seungha Hwang<sup>3</sup>, Yeon-Soo Seo<sup>2</sup>, Jin Young Kang<sup>3\*</sup>, Changwon Kang<sup>2\*</sup>, Sungchul Hohng<sup>1\*</sup>

<sup>1</sup> Department of Physics and Astronomy, and Institute of Applied Physics, Seoul National University, Seoul 08826, Republic of Korea

<sup>2</sup> Department of Biological Sciences, Korea Advanced Institute of Science and Technology, Daejeon 34141, Republic of Korea

<sup>3</sup> Department of Chemistry, Korea Advanced Institute of Science and Technology, Daejeon 34141, Republic of Korea

<sup>4</sup> Present address: Department of Physics, University of Oxford, Oxford OX1 3PU, UK

\* Corresponding authors: shohng@snu.ac.kr; ckang@kaist.ac.kr; jykang59@kaist.ac.kr

## Contents

Supplementary Figure 1: Single-molecule imaging

Supplementary Figure 2: Timings of fluorophore photobleaching and RNA release

Supplementary Figure 3: Detailed explanation of fluorescence time traces

Supplementary Figure 4: Portions of recycling and decomposing terminations in holistic assays

Supplementary Figure 5: Representative fluorescence time traces of stand-by and catch-up assays

Supplementary Figure 6: Stability of  $\rho$ -RNAP complex

Supplementary Figure 7: Masking efficiencies of  $\rho$  mutants

Supplementary Figure 8: *In vitro* bulk transcription assays

Supplementary Figure 9: Background termination of five  $\rho$ -dependent terminators

Supplementary Figure 10: Purification of  $\rho$  mutants

Supplementary Table 1: Oligonucleotide sequences

Supplementary Table 2: Termination efficiencies

Supplementary Table 3: Readthrough and termination timings (Fig. 3d-e)

Supplementary Table 4: Statistics for readthrough and termination timings (Fig. 3d)

**Abbreviations:** BSA, bovine serum albumin; EC, elongation complex; nt, nucleotides; NTP, ribonucleotide(s); PIFE, protein-induced fluorescence enhancement; TE, termination efficiency

## Supplementary Figures

**Supplementary Figure 1 | Single-molecule imaging. a-b.** Cy3-labeled RNA images (black spots) were taken just before (left) and 600 s after (right) injection of NTP+ $\rho$  (**a**) or  $\rho$  alone (**b**). The scale bar is 5  $\mu\text{m}$  long. On the right images in **a** and **b**, blue circles indicate the spots that lost Cy3-RNA after the injection, and red circles indicate those that did not. The red circles on the right image in **a** could be transcriptionally inactive complexes or the active complexes where termination or run-off has not occurred yet.

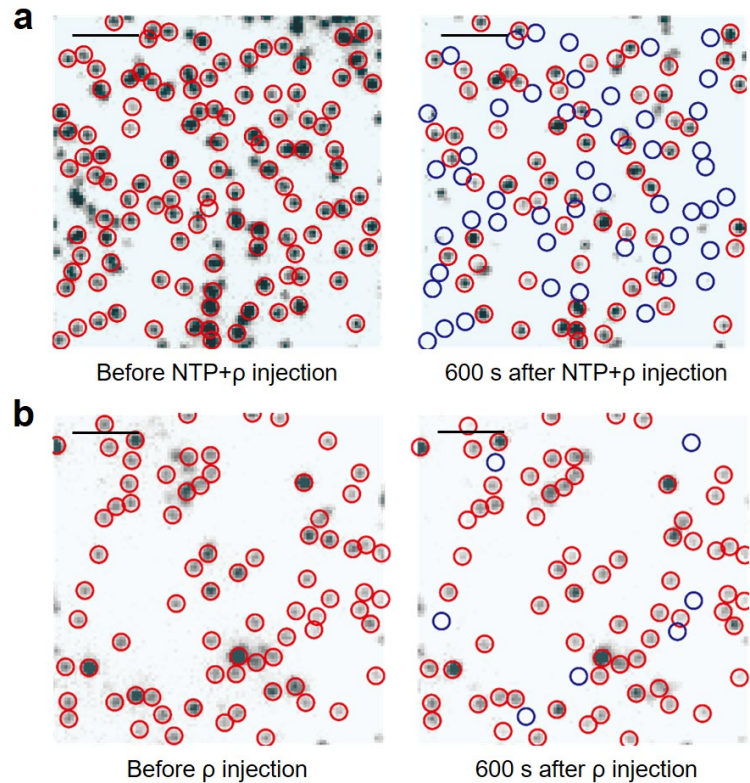

**Supplementary Figure 2 | Timings of fluorophore photobleaching and RNA release.** We measured photobleaching time with injection of  $\rho$  alone without NTPs (black,  $n = 110$  molecules), and RNA release time with injection of both  $\rho$  and NTPs (red,  $n = 340$  molecules). The fractions of molecules with Cy3 fluorescence in y-axis are plotted as a function of time after the injection in x-axis, and fit to single exponential functions. Source data are provided in a Source Data file.

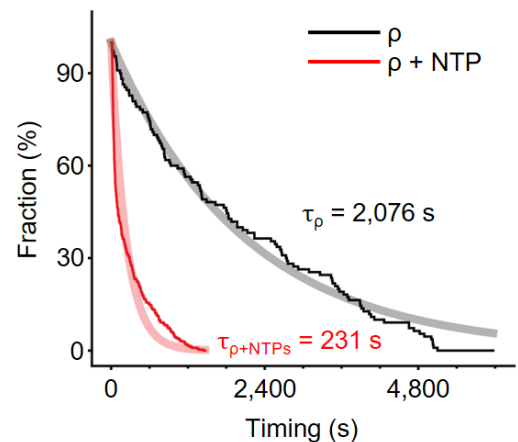

**Supplementary Figure 3 | Detailed explanation of fluorescence time traces. a-c.** Detailed fluorescence time traces for readthrough (**a**), recycling termination (**b**), and decomposing termination (**c**). Vertical line in each time trace indicates timing of NTP addition. Below the traces, gray time ribbon shows the absence (blank) and presence (filled) of NTPs. Green time ribbon shows Cy3 fluorescence changes. Red time ribbon shows Cy5 fluorescence changes. At the bottom, schematic diagrams of the molecular events drawn from the fluorescence changes are shown.

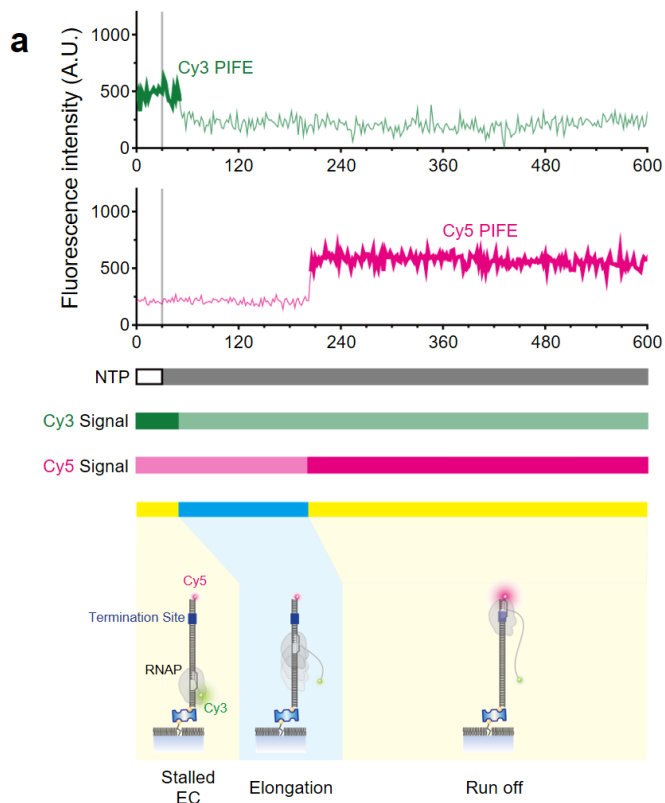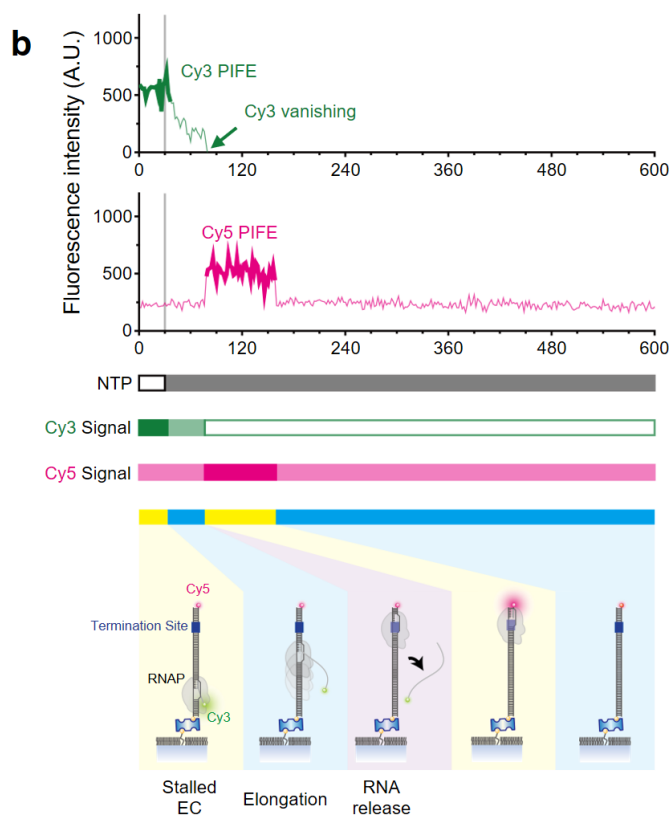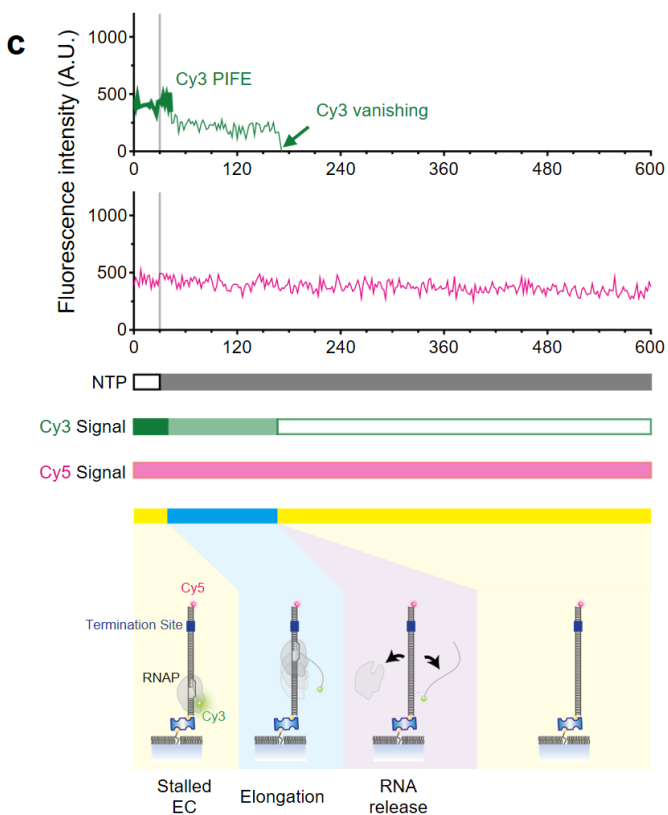

**Supplementary Figure 4 | Portions of recycling and decomposing terminations in holistic assays.** Portions of recycling TEs (solid) and decomposing TEs (open) measured in holistic assays in y-axis are plotted against  $\rho$  concentrations (5 to 200 nM) in x-axis. An error bar represents standard deviation of mean from  $n \geq 3$  independent experiments each with  $>50$  molecules. Source data are provided in a Source Data file.

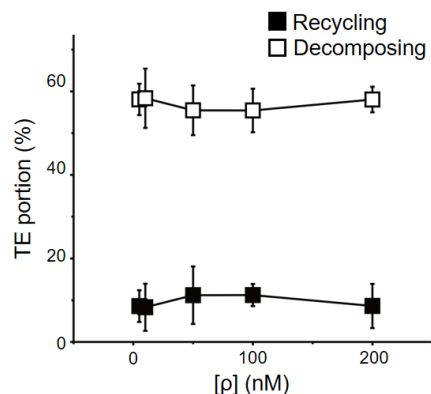

**Supplementary Figure 5 | Representative fluorescence time traces of stand-by and catch-up assays.** a-b. Representative fluorescence time traces of Cy3 (green) and Cy5 (red) at Cy3 excitation (top) and Cy5 excitation (bottom) in stand-by assay (a) and catch-up assay (b). NTP+ $\rho$  were injected at 30 s (gray lines) after the fluorescence monitoring starts.

**a Stand-by assay**

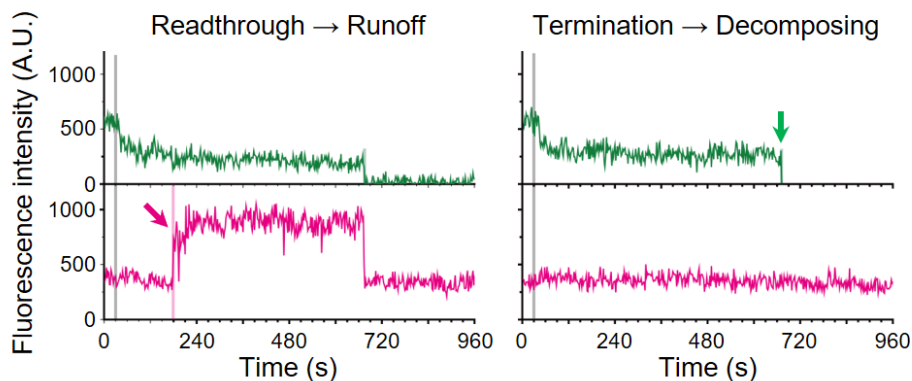

**b Catch-up assay**

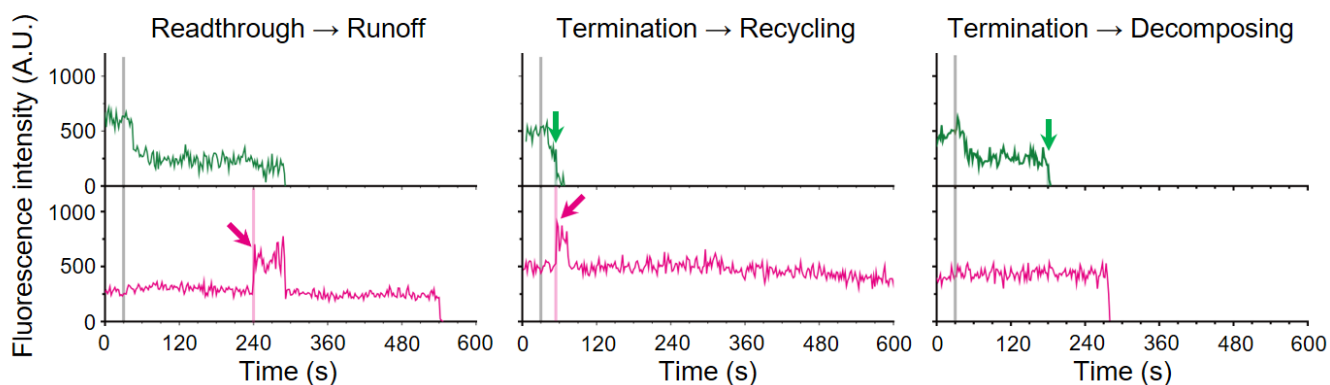

**Supplementary Figure 6 | Stability of  $\rho$ -RNAP complex.**

Normalized TEs, i.e.  $\rho$ -dependent TEs divided by (100% - background TE), of *mgtA* terminator by pre-bound  $\rho$  in y-axis are plotted against the interval time between  $\rho$  wash-out and NTP injection without (open, 693 s) and with (solid, 1,803 s) NusA and NusG in x-axis, and fit to single exponential functions. Source data are provided in a Source Data file.

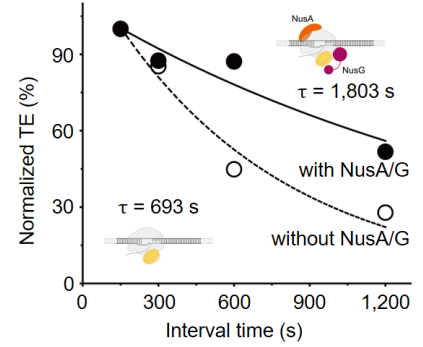

**Supplementary Figure 7 | Masking efficiencies of  $\rho$  mutants. a.** Scheme for the stand-by single-molecule assay modified for estimating the masking efficiencies of  $\rho$  mutants. **b-c.** The  $\rho$ -dependent decomposing TEs were measured with sequential incubation of a  $\rho$  mutant and wild-type (masking) or with wild-type  $\rho$  alone (stand-by) in the modified stand-by assays without (b) or with (c) NusA and NusG. An error bar represents standard deviation of mean from  $n \geq 3$  independent experiments each with  $>50$  molecules. Source data are provided in a Source Data file.

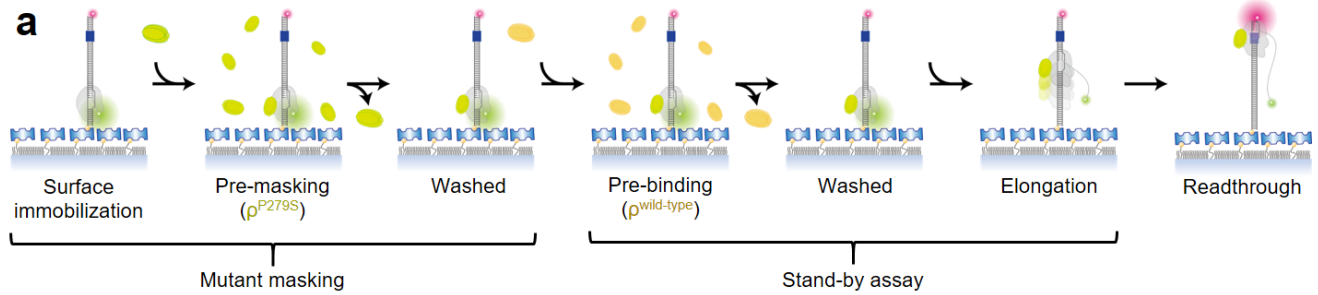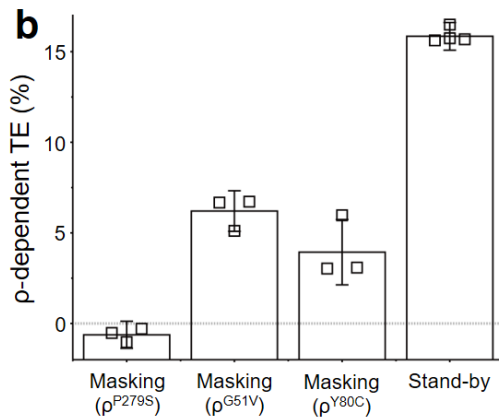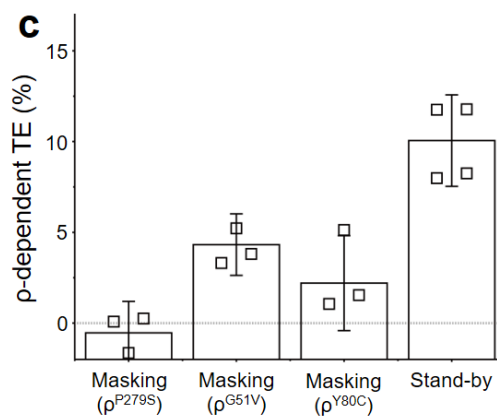

**Supplementary Figure 8 | *In vitro* bulk transcription assays.** a-e. Bulk transcription reactions were carried out *in vitro* with a template harboring *mgtA* terminator (a), *λtR1* terminator (b), *trp-t'* terminator (c), *rho* terminator (d), or *ribB* terminator (e) at 0, 15, 30, or 60 nM  $\rho$  and in the absence or presence of NusA and NusG (NusA/G) for 10 min. The run-off (RO) and terminated transcript bands (vertical lines) are marked to the right of each gel image. RNA size markers from 100 to 314 nucleotides (nt) were used in 6%-polyacrylamide urea gel electrophoresis. The raw and  $\rho$ -dependent ( $\rho$ -dep) TEs are shown below each gel image. Source data are provided in a Source Data file.

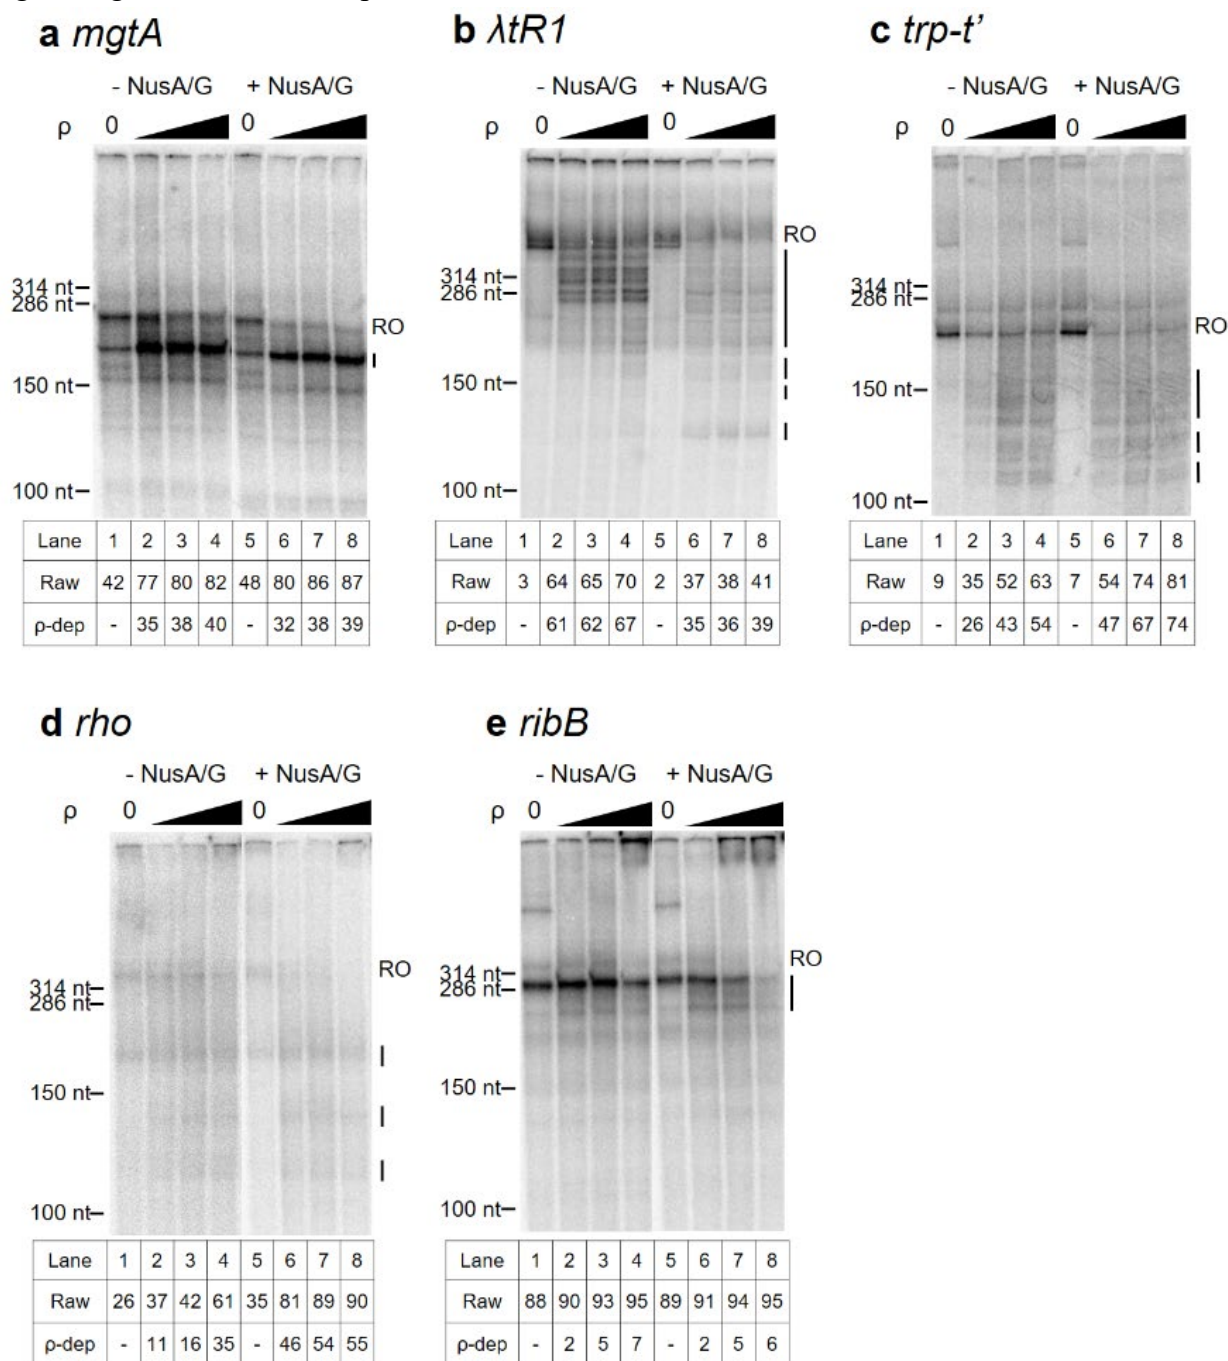

**Supplementary Figure 9 | Background termination of five  $\rho$ -dependent terminators.** Background TEs of five  $\rho$ -dependent terminators were measured without  $\rho$ . An error bar represents the standard deviation of mean from  $n \geq 3$  independent experiments each with  $>50$  molecules. Source data are provided as a Source Data file.

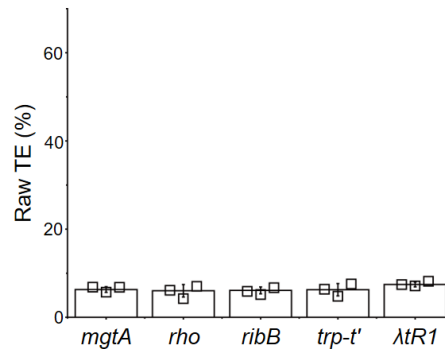

**Supplementary Figure 10 | Purification of  $\rho$  mutants.** Four mutants of *E. coli*  $\rho$  were highly purified in soluble forms with a C-terminal His<sub>6</sub> tag. Final products (2  $\mu$ g each) were compared with bovine serum albumin (BSA) and molecular weight standards (15 to 160 kDa) in 12% sodium dodecyl sulphate–polyacrylamide gel electrophoresis. The yields were high, 36% for G51V, 18% for Y80C, 19% for P279L, and 33% for P279S. The G51V, Y80C, and P279S mutants are completely inactive for termination (Fig. 1d), while the P279L mutant is partially active.

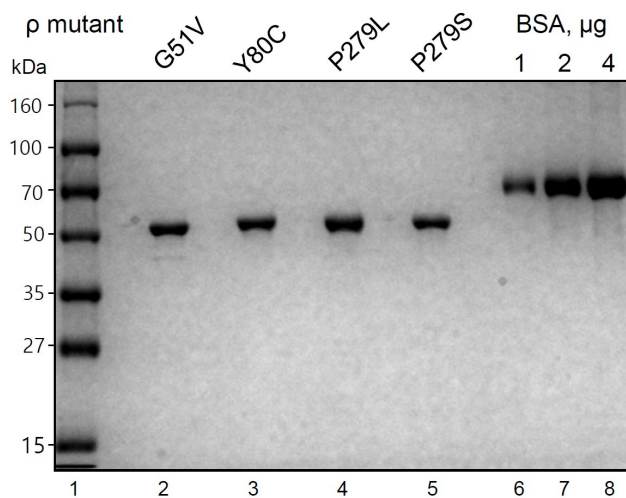

## Supplementary Tables

### Supplementary Table 1 | Oligonucleotide sequences

#### 1. *mgtA* terminator (314 bp) template

The template was constructed by ligation of A and B1 fragments with AB splint. The mutants for shearing tests were constructed by ligation of A and a B2 with AB. The mutants for displacing tests were constructed by ligation of A and a B3 with AB. Mutations are underlined.

| Name             | Length | Sequence in the 5' to 3' direction                                                                                                                                                                                   |
|------------------|--------|----------------------------------------------------------------------------------------------------------------------------------------------------------------------------------------------------------------------|
| A                | 200 nt | TATCAAAAAGAGTATTGACTTAAAGTCTAACCTATAGGATACTTACAGCCATACCGCCA<br>CAAAACTTATGGATTTATGCGTATAATCCGCGGGCGCAAATTATTTACTTACCGGAGGCGA<br>CATGGACCCTGAACCCACCCCTCTCCCGCGATGGAGAATTTTCTTTTCCGGTAAGCCT<br>GCCTCTGCTGTCTTACCGGTGT |
| B1               | 114 nt | pGTAAGACAGTGACACAATAACGTCCCTGTTTTTATTTAAACATTGCTCATCGGGCAAG<br>GCTTTGCCGTGCCTGAAGAATTTTCTGCGCCTGACTTCGGCGCGGAGGGATTACCT                                                                                              |
| AB               | 40 nt  | TTATTGTGTCACTGTCTTACACACCGGTAAGACAGCAGAG                                                                                                                                                                             |
| B2(1)<br>(AU11)  | 114 nt | pGTAAGACAGTGACACAATAACGTCCCTGTTTTTATTTAAACATTGCTCATCGGGCAAG<br>G <u>CGGG</u> GCCGTGCCTGAAGAATTTTCTGCGCCTGACTTCGGCGCGGAGGGATTACCT                                                                                     |
| B2(2)<br>(AU56)  | 114 nt | pGTAAGACAGTGACACAATAACGTCCCTGTTTTTATTTAAACATTGCTCATCGGGCAAG<br>G <u>TTTT</u> GCCGTGCCTGAAGAATTTTCTGCGCCTGACTTCGGCGCGGAGGGATTACCT                                                                                     |
| B2(3)<br>(AU67)  | 114 nt | pGTAAGACAGTGACACAATAACGTCCCTGTTTTTATTTAAACATTGCTCATCGGGCAAG<br>GCTTT <u>TT</u> CGTGCCTGAAGAATTTTCTGCGCCTGACTTCGGCGCGGAGGGATTACCT                                                                                     |
| B2(4)<br>(AU78)  | 114 nt | pGTAAGACAGTGACACAATAACGTCCCTGTTTTTATTTAAACATTGCTCATCGGGCAAG<br>G <u>TTTTTT</u> CGTGCCTGAAGAATTTTCTGCGCCTGACTTCGGCGCGGAGGGATTACCT                                                                                     |
| B2(5)<br>(AU100) | 114 nt | pGTAAGACAGTGACACAATAACGTCCCTGTTTTTATTTAAACATTGCTCATCGGGCAAG<br>G <u>TTTTTT</u> TATGCTGAAGAATTTTCTGCGCCTGACTTCGGCGCGGAGGGATTACCT                                                                                      |
| B3(1)<br>(nt16)  | 114 nt | pGTAAGACAGTGACACAATAACGTCCCTGTTTTTATTTAAACATTGCTCATCGGGCAAG<br>GCTTTGCCGTGCCTGAAGAATTTT <u>AC</u> CGGCCTGACTTCGGCGCGGAGGGATTACCT                                                                                     |
| B3(2)<br>(nt1)   | 114 nt | pGTAAGACAGTGACACAATAACGTCCCTGTTTTTATTTAAACATTGCTCATCGGGCAAG<br>GCTTTGCCG <u>AC</u> GCTGAAGAATTTTCTGCGCCTGACTTCGGCGCGGAGGGATTACCT                                                                                     |
| B3(3)<br>(nt3)   | 114 nt | pGTAAGACAGTGACACAATAACGTCCCTGTTTTTATTTAAACATTGCTCATCGGGCAAG<br>GCTTTGCG <u>C</u> GCCTGAAGAATTTTCTGCGCCTGACTTCGGCGCGGAGGGATTACCT                                                                                      |
| B3(4)<br>(nt5)   | 114 nt | pGTAAGACAGTGACACAATAACGTCCCTGTTTTTATTTAAACATTGCTCATCGGGCAAG<br>GCTTT <u>CGGG</u> TGCCTGAAGAATTTTCTGCGCCTGACTTCGGCGCGGAGGGATTACCT                                                                                     |
| B3(5)<br>(nt7)   | 114 nt | pGTAAGACAGTGACACAATAACGTCCCTGTTTTTATTTAAACATTGCTCATCGGGCAAG<br>GCT <u>TAAC</u> CCGTGCCTGAAGAATTTTCTGCGCCTGACTTCGGCGCGGAGGGATTACCT                                                                                    |
| B3(6)<br>(nt9)   | 114 nt | pGTAAGACAGTGACACAATAACGTCCCTGTTTTTATTTAAACATTGCTCATCGGGCAAG<br>G <u>GAA</u> TGCCGTGCCTGAAGAATTTTCTGCGCCTGACTTCGGCGCGGAGGGATTACCT                                                                                     |
| B3(7)<br>(nt11)  | 114 nt | pGTAAGACAGTGACACAATAACGTCCCTGTTTTTATTTAAACATTGCTCATCGGGCAAG<br><u>CG</u> TTTGCCGTGCCTGAAGAATTTTCTGCGCCTGACTTCGGCGCGGAGGGATTACCT                                                                                      |
| B3(8)<br>(nt13)  | 114 nt | pGTAAGACAGTGACACAATAACGTCCCTGTTTTTATTTAAACATTGCTCATCGGGCT <u>TC</u><br>GCTTTGCCGTGCCTGAAGAATTTTCTGCGCCTGACTTCGGCGCGGAGGGATTACCT                                                                                      |



|                  |        |                                                                                                                          |
|------------------|--------|--------------------------------------------------------------------------------------------------------------------------|
| B3(9)<br>(nt15)  | 114 nt | 5pGTAAGACAGTGACACAATAACGTCCCTGTTTTTATTTAAACATTGCTCATCGGCGTAG<br>GCTTTGCCGTGCCTGAAGAATTTTCTGCGCCTGACTTCGGCGCGGAGGGATTACCT |
| B3(10)<br>(nt17) | 114 nt | pGTAAGACAGTGACACAATAACGTCCCTGTTTTTATTTAAACATTGCTCATCCCCAAG<br>GCTTTGCCGTGCCTGAAGAATTTTCTGCGCCTGACTTCGGCGCGGAGGGATTACCT   |
| B3(11)<br>(nt19) | 114 nt | pGTAAGACAGTGACACAATAACGTCCCTGTTTTTATTTAAACATTGCTCAAGCGGCAAG<br>GCTTTGCCGTGCCTGAAGAATTTTCTGCGCCTGACTTCGGCGCGGAGGGATTACCT  |
| B3(12)<br>(nt21) | 114 nt | pGTAAGACAGTGACACAATAACGTCCCTGTTTTTATTTAAACATTGCTGTACGGGCAAG<br>GCTTTGCCGTGCCTGAAGAATTTTCTGCGCCTGACTTCGGCGCGGAGGGATTACCT  |
| B3(13)<br>(nt23) | 114 nt | pGTAAGACAGTGACACAATAACGTCCCTGTTTTTATTTAAACATTGGAGATCGGGCAAG<br>GCTTTGCCGTGCCTGAAGAATTTTCTGCGCCTGACTTCGGCGCGGAGGGATTACCT  |
| B3(14)<br>(nt25) | 114 nt | pGTAAGACAGTGACACAATAACGTCCCTGTTTTTATTTAAACATACGTCATCGGGCAAG<br>GCTTTGCCGTGCCTGAAGAATTTTCTGCGCCTGACTTCGGCGCGGAGGGATTACCT  |
| B3(15)<br>(nt41) | 114 nt | pGTAAGACAGTGACACAATAACGTCCCTCAATTTATTTAAACATTGCTCATCGGGCAAG<br>GCTTTGCCGTGCCTGAAGAATTTTCTGCGCCTGACTTCGGCGCGGAGGGATTACCT  |

## 2. *rho* terminator (390 bp) template

The template was constructed by ligation of rho-A and rho-B fragments with rho-AB splint.

| Name   | Length | Sequence in the 5' to 3' direction                                                                                                                                                                                    |
|--------|--------|-----------------------------------------------------------------------------------------------------------------------------------------------------------------------------------------------------------------------|
| rho-A  | 200 nt | TATCAAAAAGAGTATTGACTTAAAGTCTAACCTATAGGATACTTACAGCCATACCCCTA<br>AATTGTCAGGATCTCTGGACGCCCGGTCTGAGTCGTGCTAAGTTAGTATTGACTTCGAA<br>TTAAACATACCTTATTAAGTTTGAATCTGGTTTTATCCGTCACCTCCCGTTTTTTCTCGCA<br>CGAGAAGTGGAAAGATTCCCTG |
| rho-B  | 190 nt | pGCTCTTCGCTCATTCCGTCTTGTGCTTTCAGTTCTGCGTACTTTCCTGTGACCAGACA<br>GCCAACAGACATGAGTTGATAGCCGTAAACAGGCATGGATGACCCTGCCATACCATTTC<br>ACAACATTAAGTTCGAGATTACCCCAAGTTTAAAGAACTCACACCATTATGAATCTTAC<br>CGAATTAAGAATAC           |
| rho-AB | 40 nt  | AGACGGAATGAGCGAAGAGCCAGGAATCTTCCACTTCTC                                                                                                                                                                               |

## 3. *ribB* terminator (350 bp) template

The template was constructed by ligation of rib-A and rib-B fragments with rib-AB splint.

| Name   | Length | Sequence in the 5' to 3' direction                                                                                                                                                                                     |
|--------|--------|------------------------------------------------------------------------------------------------------------------------------------------------------------------------------------------------------------------------|
| rib-A  | 200 nt | TATCAAAAAGAGTATTGACTTAAAGTCTAACCTATAGGATACTTACAGCCATCCACCCT<br>CAGGGCGGGGCGAAATTCACCACCGGCGGTAAATCAACTCAGTTGAAAGCCCAGGAG<br>CGCTTTGGGTGCGAACTCAAAGGACAGCAGATCCGGTGTAATTCGGGGGCCGACGGT<br>TAGAGTCCGGATGGGAGAGAGTAACGA3' |
| rib-B  | 150 nt | pTTCTGTCGGGCATGGACCCGCTCACGTTATTTGGCTATATGCCGCCACTCCTAAGACT<br>GCCCTGATTCTGGTAAACCATAATTTAGTGAGGTTTTTTTACCATGAATCAGACGCTACT<br>TTCCTTTTTGGTACGCCTTTCGAACGTGTT                                                          |
| rib-AB | 40 nt  | CGGGTCCATGCCCGACAGAATCGTTACTCTCTCCCATCCG                                                                                                                                                                               |

#### 4. *trp t'* terminator (286 bp) template

The template was constructed by ligation of *trp-A* and *trp-B* fragments with *trp-AB* splint.

| Name          | Length | Sequence in the 5' to 3' direction                                                                                                                                                                                 |
|---------------|--------|--------------------------------------------------------------------------------------------------------------------------------------------------------------------------------------------------------------------|
| <i>trp-A</i>  | 200 nt | TATCAAAAAGAGTATTGACTTAAAGTCTAACCTATAGGATACTTACAGCCATACGCCGG<br>TCGAACGTCAACTTACGTCATTTTTCCGCCAACAGTAATATAATCAAACAAATTAATC<br>CCGCAACATAACACCAGTAAAATCAATAATTTCTCTAAGTCACTTATTCCTCAGGTAAT<br>TGTTAATATATCCAGAATGTTT |
| <i>trp-B</i>  | 86 nt  | pCTCAAAATATATTTTTCCCTCTATCTTCTCGTTGCGCTTAATTTGACTAATTCTCATTAGC<br>GACTAATTTTAATGAGTGTGCGACACA                                                                                                                      |
| <i>trp-AB</i> | 40 nt  | GAGGGAAAATATATTTTTGAGGAACATTCTGGATATATTA                                                                                                                                                                           |

#### 5. $\lambda$ *tR1* terminator (548 bp) template

The template was constructed by ligation of *tr1-A*, *tr1-B* and *tr1-C* fragments with *tr1-AB* and *tr1-BC* splints.

| Name          | Length | Sequence in the 5' to 3' direction                                                                                                                                                                                  |
|---------------|--------|---------------------------------------------------------------------------------------------------------------------------------------------------------------------------------------------------------------------|
| <i>tr1-A</i>  | 200 nt | TATCAAAAAGAGTATTGACTTAAAGTCTAACCTATAGGATACTTACAGCCATCAAGTAA<br>GGAGGTTGTATGGAACAACGCATAACCCTGAAAGATTATGCAATGCGCTTTGGGCAAA<br>CCAAGACAGCTAAAGATCTCGGCGTATATCAAAGCGCGATCAACAAGGCCATTCATGC<br>AGGCCGAAAGATTTTTTAACTATA |
| <i>tr1-B</i>  | 200 nt | pAACGCTGATGGAAGCGTTTATGCGGAAGAGGTAAAGCCCTCCCGAGTAACAAAAA<br>AACACAGCATAAATAACCCCGCTCTTACACATTCCAGCCCTGAAAAAGGGCATCAAA<br>TTAAACCACACCTATGGTGTATGCATTTATTTGCATACATTCAATCAATTGTTATCTAAGG<br>AAATACTTACATATGGTTCGTGCAA |
| <i>tr1-C</i>  | 148 nt | pACAAACGCAACGAGGCTCTACGAATCGAGAGTGCCTTACAAAATCGCAATGC<br>TTGGAAGTGAAGACAGCGAAGCTGTGGGCGTTGATAAGTCGCAGATCAGCAGGT<br>GGAAGAGGGACTGGATTCCAAAGTTCTCAATGCT                                                               |
| <i>tr1-AB</i> | 40 nt  | TAAACGCTTCCATCAGCGTTTATAGTTAAAAAATCTTTC                                                                                                                                                                             |
| <i>tr1-BC</i> | 40 nt  | TAGAGCCTCGTTGCGTTTGTGTTGCACGAACCATATGTAAG                                                                                                                                                                           |

The ligation products were amplified by PCR using a common biotin-labeled forward primer 5'TATCAAAAAGAGTATTG ACTTAAAGTCTAA and a respective Cy5-labeled backward primer, 5'AGGTAATCCCTCCGC for *mgtA* terminator, 5'AGCATTGAGAACTTTGGAATC for  $\lambda$  *tR1* terminator, 5'TGTGTCGACACTCATTAAAATTAG for *trp t'* terminator, 5'GTATTCTTTAATTCGGTAAGATTCATAATG for *rho* terminator, or 5'AACACGTTTCGAAAGGC for *ribB* terminator.

## Supplementary Table 2 | Termination efficiencies (TEs)

$\rho$ -dependent TEs were estimated by subtracting the background TE (6.3%) from raw TEs.

Normalized TEs were estimated by dividing  $\rho$ -dependent TEs with (100% - background TE).

$n$  means the number of molecules analyzed.

### 1. $\rho$ -dependent TEs of *mgtA* terminator at varying concentrations of $\rho$ (holistic assay, Fig. 1d)

| [ $\rho$ ] (nM) | Assay    | Decomposing termination (%) | Recycling termination (%) | $n$ in replicated experiments   |
|-----------------|----------|-----------------------------|---------------------------|---------------------------------|
| 0.5             | Holistic | 9.3 $\pm$ 0.8               | 0.0 $\pm$ 0.0             | 301 = 68 + 116 + 117            |
| 1               | Holistic | 9.9 $\pm$ 2.1               | 0.0 $\pm$ 0.0             | 303 = 75 + 105 + 123            |
| 5               | Holistic | 32.5 $\pm$ 2.1              | 4.8 $\pm$ 2.1             | 250 = 58 + 75 + 117             |
| 10              | Holistic | 43.6 $\pm$ 5.3              | 6.2 $\pm$ 4.2             | 403 = 190 + 100 + 113           |
| 50              | Holistic | 42.4 $\pm$ 4.5              | 8.6 $\pm$ 5.3             | 304 = 132 + 105 + 67            |
| 100             | Holistic | 42.5 $\pm$ 4.0              | 8.6 $\pm$ 2.0             | 592 = 226 + 108 + 65 + 70 + 123 |
| 200             | Holistic | 47.1 $\pm$ 2.5              | 7.0 $\pm$ 4.3             | 358 = 66 + 92 + 125 + 75        |

### 2. $\rho$ -dependent TEs of *mgtA* terminator at varying concentrations of $\rho$ (stand-by assay, Fig. 1f)

| Condition                       | Decomposing termination (%) | Recycling termination (%) | $n$ in replicated experiments   |
|---------------------------------|-----------------------------|---------------------------|---------------------------------|
| $\rho$ <sup>a</sup>             | 42.5 $\pm$ 4.0              | 8.6 $\pm$ 2.0             | 592 = 226 + 108 + 65 + 70 + 123 |
| $-\rho$ <sup>b</sup>            | 6.3 $\pm$ 0.7               | 0.0 $\pm$ 0.0             | 413 = 103 + 117 + 193           |
| $\rho$ + inhibitor <sup>c</sup> | 7.6 $\pm$ 1.0               | 0.0 $\pm$ 0.0             | 210 = 37 + 90 + 83              |
| $\rho$ <sup>p279S d</sup>       | 7.5 $\pm$ 1.7               | 0.0 $\pm$ 0.0             | 279 = 120 + 83 + 76             |
| $\rho$ <sup>G51V d</sup>        | 7.6 $\pm$ 1.0               | 0.0 $\pm$ 0.0             | 290 = 108 + 63 + 119            |
| $\rho$ <sup>Y80C d</sup>        | 6.9 $\pm$ 0.8               | 0.0 $\pm$ 0.0             | 219 = 56 + 80 + 83              |

<sup>a</sup> Holistic assay ([ $\rho$ ] = 100 nM)

<sup>b</sup> Transcription without  $\rho$

<sup>c</sup> Holistic assay ([ $\rho$ ] = 100 nM, and [bicyclomycin] = 1 mM)

<sup>d</sup> Holistic assay with a  $\rho$  mutant at [ $\rho$ ] = 100 nM

### 3. $\rho$ -dependent TEs of *mgtA* terminator at varying concentrations of $\rho$ (stand-by assay, Fig. 2b)

| [ $\rho$ ] (nM) | Assay    | Decomposing termination (%) | Recycling termination (%) | $n$ in replicated experiments |
|-----------------|----------|-----------------------------|---------------------------|-------------------------------|
| 0.5             | Stand-by | 6.3 $\pm$ 1.0               | 0.0 $\pm$ 0.0             | 247 = 93 + 77 + 77            |
| 1               | Stand-by | 8.0 $\pm$ 0.8               | 0.0 $\pm$ 0.0             | 224 = 65 + 68 + 91            |
| 5               | Stand-by | 8.1 $\pm$ 2.0               | 0.0 $\pm$ 0.0             | 417 = 85 + 54 + 199 + 79      |
| 10              | Stand-by | 8.7 $\pm$ 1.0               | 0.0 $\pm$ 0.0             | 246 = 53 + 91 + 102           |
| 50              | Stand-by | 11.0 $\pm$ 0.7              | 0.3 $\pm$ 0.5             | 336 = 123 + 99 + 114          |
| 100             | Stand-by | 15.8 $\pm$ 0.8              | 0.2 $\pm$ 0.3             | 420 = 91 + 73 + 79 + 177      |
| 200             | Stand-by | 17.0 $\pm$ 1.4              | 0.0 $\pm$ 0.0             | 326 = 168 + 72 + 86           |

4.  $\rho$ -dependent TEs of *mgtA* terminator at varying concentrations of  $\rho$  (catch-up assay, Fig. 2e)

| [ $\rho$ ] (nM) | Assay    | Decomposing termination (%) | Recycling termination (%) | $n$ in replicated experiments    |
|-----------------|----------|-----------------------------|---------------------------|----------------------------------|
| 0.5             | Catch-up | $7.6 \pm 1.8$               | $1.3 \pm 2.3$             | 317 = 125 + 91 + 101             |
| 1               | Catch-up | $9.5 \pm 1.2$               | $0.0 \pm 0.0$             | 241 = 68 + 95 + 78               |
| 5               | Catch-up | $8.3 \pm 1.1$               | $1.7 \pm 1.3$             | 302 = 90 + 117 + 95              |
| 10              | Catch-up | $14.0 \pm 1.2$              | $0.5 \pm 1.0$             | 207 = 57 + 75 + 75               |
| 50              | Catch-up | $23.8 \pm 2.7$              | $3.1 \pm 3.0$             | 259 = 56 + 106 + 97              |
| 100             | Catch-up | $23.4 \pm 3.7$              | $5.9 \pm 3.8$             | 236 = 83 + 82 + 71               |
| 200             | Catch-up | $24.5 \pm 4.8$              | $4.3 \pm 3.8$             | 588 = 133 + 86 + 109 + 110 + 150 |

5.  $\rho$ -dependent TEs of various terminators (Fig. 3a, Fig. 3b)

| Terminator                     | Assay    | Decomposing termination (%) | Recycling termination (%) | $n$ in replicated experiments   |
|--------------------------------|----------|-----------------------------|---------------------------|---------------------------------|
| <i>mgtA</i>                    | Holistic | $42.5 \pm 4.0$              | $8.6 \pm 2.0$             | 592 = 226 + 108 + 65 + 70 + 123 |
|                                | Stand-by | $15.8 \pm 0.8$              | $0.2 \pm 0.3$             | 420 = 91 + 73 + 79 + 177        |
|                                | Catch-up | $23.4 \pm 3.7$              | $5.9 \pm 3.8$             | 236 = 83 + 82 + 71              |
| <i>rho</i>                     | Holistic | $22.1 \pm 3.1$              | $6.1 \pm 1.9$             | 278 = 136 + 65 + 77             |
|                                | Stand-by | $10.7 \pm 2.3$              | $0.0 \pm 0.0$             | 221 = 55 + 95 + 67              |
|                                | Catch-up | $27.8 \pm 4.7$              | $5.9 \pm 3.8$             | 465 = 256 + 146 + 63            |
| <i>ribB</i>                    | Holistic | $9.3 \pm 2.8$               | $3.0 \pm 2.7$             | 364 = 129 + 143 + 92            |
|                                | Stand-by | $6.2 \pm 1.8$               | $0.0 \pm 0.0$             | 301 = 136 + 88 + 77             |
|                                | Catch-up | $10.0 \pm 2.8$              | $1.3 \pm 1.2$             | 305 = 93 + 79 + 133             |
| <i>trp-t'</i>                  | Holistic | $30.2 \pm 1.8$              | $11.3 \pm 3.6$            | 406 = 200 + 69 + 137            |
|                                | Stand-by | $3.8 \pm 2.7$               | $0.5 \pm 0.9$             | 420 = 248 + 116 + 56            |
|                                | Catch-up | $26.5 \pm 2.0$              | $9.0 \pm 2.7$             | 412 = 130 + 150 + 132           |
| <i><math>\lambda</math>tRI</i> | Holistic | $32.5 \pm 2.9$              | $4.1 \pm 1.4$             | 243 = 77 + 108 + 58             |
|                                | Stand-by | $0.4 \pm 0.6$               | $0.0 \pm 0.0$             | 422 = 167 + 86 + 65 + 104       |
|                                | Catch-up | $30.5 \pm 1.2$              | $4.1 \pm 0.5$             | 416 = 161 + 62 + 114 + 79       |
| <i>mgtA</i><br>(+NusA/G)       | Holistic | $28.0 \pm 3.0$              | $6.8 \pm 3.3$             | 399 = 113 + 133 + 153           |
|                                | Stand-by | $10.1 \pm 2.5$              | $0.0 \pm 0.0$             | 553 = 107 + 151 + 123 + 172     |
|                                | Catch-up | $11.5 \pm 2.0$              | $1.7 \pm 1.8$             | 473 = 143 + 129 + 88 + 113      |

6. Normalized  $\rho$ -dependent TEs of various hybrid-shearing mutants of *mgtA* terminator (stand-by assay, Fig. 4c, Fig. 4d)

| Substrate | Assay    | Decomposing termination (%) | Recycling termination (%) | $n$ in replicated experiments |
|-----------|----------|-----------------------------|---------------------------|-------------------------------|
| AU11      | Stand-by | $7.3 \pm 1.7$               | $0.2 \pm 0.3$             | 592 = 229 + 123 + 240         |
| AU44 (WT) | Stand-by | $16.9 \pm 0.8$              | $0.2 \pm 0.3$             | 420 = 91 + 73 + 79 + 177      |
| AU55      | Stand-by | $6.8 \pm 1.7$               | $0.0 \pm 0.0$             | 491 = 152 + 153 + 186         |
| AU66      | Stand-by | $11.2 \pm 1.1$              | $0.0 \pm 0.0$             | 413 = 152 + 98 + 163          |
| AU77      | Stand-by | $14.4 \pm 0.9$              | $0.0 \pm 0.0$             | 536 = 246 + 137 + 153         |
| AU100     | Stand-by | $0.7 \pm 1.3$               | $0.0 \pm 0.0$             | 571 = 251 + 180 + 140         |

7. Normalized  $\rho$ -dependent TEs of various hybrid-shearing mutants of *mgtA* terminator (catch-up assay, Fig. 4c, Fig. 4d)

| Substrate | Assay    | Decomposing termination (%) | Recycling termination (%) | <i>n</i> in replicated experiments |
|-----------|----------|-----------------------------|---------------------------|------------------------------------|
| AU11      | Catch-up | 26.3 ± 1.6                  | 5.5 ± 0.6                 | 488 = 166 + 172 + 150              |
| AU44 (WT) | Catch-up | 24.9 ± 4.0                  | 5.9 ± 3.8                 | 236 = 83 + 82 + 71                 |
| AU55      | Catch-up | 19.5 ± 1.1                  | 7.9 ± 1.9                 | 493 = 166 + 191 + 136              |
| AU66      | Catch-up | 11.4 ± 0.9                  | 9.1 ± 0.8                 | 570 = 153 + 144 + 108 + 165        |
| AU77      | Catch-up | 29.3 ± 1.2                  | 12.2 ± 1.5                | 576 = 166 + 242 + 168              |
| AU100     | Catch-up | 20.2 ± 2.7                  | 11.9 ± 0.7                | 385 = 148 + 143 + 94               |

8. Normalized  $\rho$ -dependent TEs of various nontemplate strand mutants of *mgtA* terminator (stand-by assay, Fig. 5b, Fig. 5c)

| Substrate  | Assay    | Decomposing termination (%) | Recycling termination (%) | <i>n</i> in replicated experiments |
|------------|----------|-----------------------------|---------------------------|------------------------------------|
| nt40 (-40) | Stand-by | 17.0 ± 1.1                  | 0.0 ± 0.0                 | 395 = 181 + 95 + 119               |
| nt24 (-24) | Stand-by | 16.3 ± 2.0                  | 0.0 ± 0.0                 | 363 = 140 + 128 + 95               |
| nt22 (-22) | Stand-by | 13.2 ± 1.0                  | 0.0 ± 0.0                 | 297 = 97 + 144 + 56                |
| nt20 (-20) | Stand-by | 17.9 ± 1.1                  | 0.0 ± 0.0                 | 225 = 67 + 62 + 96                 |
| nt18 (-18) | Stand-by | 15.5 ± 1.3                  | 0.0 ± 0.0                 | 250 = 71 + 97 + 82                 |
| nt16 (-16) | Stand-by | 17.1 ± 1.5                  | 0.0 ± 0.0                 | 360 = 128 + 155 + 77               |
| nt14 (-14) | Stand-by | 14.6 ± 1.4                  | 0.0 ± 0.0                 | 298 = 96 + 99 + 103                |
| nt12 (-12) | Stand-by | 1.8 ± 1.5                   | 0.0 ± 0.0                 | 301 = 127 + 98 + 76                |
| nt10 (-10) | Stand-by | 8.9 ± 1.6                   | 0.0 ± 0.0                 | 332 = 172 + 101 + 59               |
| nt8 (-8)   | Stand-by | 9.0 ± 2.2                   | 0.0 ± 0.0                 | 327 = 146 + 128 + 53               |
| nt6 (-6)   | Stand-by | 8.4 ± 1.1                   | 0.0 ± 0.0                 | 483 = 158 + 167 + 158              |
| nt4 (-4)   | Stand-by | 17.0 ± 1.2                  | 0.0 ± 0.0                 | 363 = 100 + 119 + 144              |
| nt2 (-2)   | Stand-by | 16.7 ± 2.0                  | 0.0 ± 0.0                 | 284 = 104 + 60 + 51 + 69           |
| nt1 (+1)   | Stand-by | 16.8 ± 1.5                  | 0.0 ± 0.0                 | 338 = 115 + 120 + 103              |
| nt17 (+17) | Stand-by | 13.8 ± 1.6                  | 0.0 ± 0.0                 | 271 = 65 + 110 + 96                |

9. Normalized  $\rho$ -dependent TEs of various nontemplate strand mutants of *mgtA* terminator (catch-up assay, Fig. 5b, Fig. 5c)

| Substrate  | Assay    | Decomposing termination (%) | Recycling termination (%) | <i>n</i> in replicated experiments |
|------------|----------|-----------------------------|---------------------------|------------------------------------|
| nt40 (-40) | Catch-up | 24.6 ± 0.7                  | 4.3 ± 0.9                 | 372 = 93 + 156 + 123               |
| nt24 (-24) | Catch-up | 20.2 ± 2.2                  | 3.7 ± 2.5                 | 428 = 173 + 93 + 162               |
| nt22 (-22) | Catch-up | 18.6 ± 1.5                  | 4.5 ± 2.8                 | 247 = 67 + 78 + 102                |
| nt20 (-20) | Catch-up | 26.7 ± 1.2                  | 4.9 ± 0.5                 | 266 = 84 + 112 + 70                |
| nt18 (-18) | Catch-up | 25.8 ± 1.5                  | 4.3 ± 0.9                 | 369 = 108 + 168 + 93               |
| nt16 (-16) | Catch-up | 27.0 ± 2.6                  | 5.7 ± 0.9                 | 280 = 115 + 89 + 76                |
| nt14 (-14) | Catch-up | 28.5 ± 5.3                  | 4.7 ± 0.1                 | 380 = 123 + 148 + 109              |
| nt12 (-12) | Catch-up | 9.0 ± 2.3                   | 5.3 ± 0.8                 | 285 = 123 + 97 + 65                |
| nt10 (-10) | Catch-up | 19.2 ± 3.4                  | 4.6 ± 0.9                 | 370 = 144 + 121 + 105              |
| nt8 (-8)   | Catch-up | 22.8 ± 2.2                  | 4.9 ± 0.5                 | 445 = 121 + 145 + 109 + 70         |

|            |          |            |           |                       |
|------------|----------|------------|-----------|-----------------------|
| nt6 (-6)   | Catch-up | 23.4 ± 0.5 | 4.8 ± 0.9 | 314 = 175 + 88 + 51   |
| nt4 (-4)   | Catch-up | 26.2 ± 1.5 | 6.2 ± 0.7 | 421 = 147 + 149 + 125 |
| nt2 (-2)   | Catch-up | 23.5 ± 1.9 | 5.7 ± 3.2 | 299 = 97 + 109 + 93   |
| nt1 (+1)   | Catch-up | 24.0 ± 1.1 | 5.4 ± 0.2 | 221 = 76 + 70 + 75    |
| nt17 (+17) | Catch-up | 22.0 ± 1.4 | 6.1 ± 3.6 | 380 = 117 + 123 + 140 |

### Supplementary Table 3 | Readthrough and termination timings (Fig. 3d-e)

$n$  means the number of molecules analyzed.

$mgtA$ +Nus indicates  $mgtA$  terminator in the presence of NusA and NusG.

#### (1-1) Decomposing termination timing in holistic assay

| Terminator    | Assay    | Pathway     | Timing (s) | $n$ in replicated experiments |
|---------------|----------|-------------|------------|-------------------------------|
| $mgtA$        | Holistic | Decomposing | 199 ± 32.4 | 289 = 113 + 49 + 36 + 34 + 57 |
| $mgtA$ +Nus   | Holistic | Decomposing | 241 ± 26.1 | 146 = 45 + 83 + 53            |
| $\rho$        | Holistic | Decomposing | 147 ± 10.2 | 78 = 35 + 19 + 24             |
| $ribB$        | Holistic | Decomposing | 596 ± 16.1 | 56 = 21 + 24 + 11             |
| $trp-t'$      | Holistic | Decomposing | 153 ± 19.3 | 148 = 71 + 26 + 51            |
| $\lambda tRI$ | Holistic | Decomposing | 240 ± 28.2 | 97 = 32 + 44 + 21             |

#### (1-2) Recycling termination timing in holistic assay

| Terminator    | Assay    | Pathway   | Timing (s) | $n$ in replicated experiments |
|---------------|----------|-----------|------------|-------------------------------|
| $mgtA$        | Holistic | Recycling | 27 ± 1.1   | 51 = 16 + 12 + 5 + 8 + 10     |
| $mgtA$ +Nus   | Holistic | Recycling | 33 ± 1.7   | 27 = 10 + 4 + 13              |
| $\rho$        | Holistic | Recycling | 20 ± 1.2   | 17 = 6 + 5 + 6                |
| $ribB$        | Holistic | Recycling | 42 ± 2.9   | 11 = 3 + 2 + 6                |
| $trp-t'$      | Holistic | Recycling | 7 ± 0.2    | 46 = 26 + 9 + 11              |
| $\lambda tRI$ | Holistic | Recycling | 16 ± 1.6   | 10 = 2 + 5 + 3                |

#### (1-3) Readthrough timing in holistic assay

| Terminator    | Assay    | Pathway     | Timing (s) | $n$ in replicated experiments |
|---------------|----------|-------------|------------|-------------------------------|
| $mgtA$        | Holistic | Readthrough | 198 ± 9.2  | 252 = 97 + 47 + 24 + 28 + 56  |
| $mgtA$ +Nus   | Holistic | Readthrough | 164 ± 13.9 | 226 = 58 + 81 + 87            |
| $\rho$        | Holistic | Readthrough | 92 ± 9.6   | 183 = 95 + 41 + 47            |
| $ribB$        | Holistic | Readthrough | 73 ± 7.9   | 297 = 105 + 117 + 75          |
| $trp-t'$      | Holistic | Readthrough | 77 ± 5.4   | 212 = 100 + 37 + 52           |
| $\lambda tRI$ | Holistic | Readthrough | 146 ± 18.8 | 136 = 43 + 59 + 34            |

## (2-1) Decomposing termination timing in stand-by assay

| Terminator      | Assay    | Pathway     | Timing (s) | <i>n</i> in replicated experiments |
|-----------------|----------|-------------|------------|------------------------------------|
| <i>mgtA</i>     | Stand-by | Decomposing | 322 ± 71.3 | 93 = 20 + 16 + 18 + 39             |
| <i>mgtA+Nus</i> | Stand-by | Decomposing | 421 ± 35.2 | 103 = 18 + 25 + 25 + 32            |
| <i>rho</i>      | Stand-by | Decomposing | 157 ± 17.4 | 37 = 8 + 17 + 12                   |
| <i>ribB</i>     | Stand-by | Decomposing | 504 ± 95.5 | 37 = 16 + 10 + 11                  |
| <i>trp-t'</i>   | Stand-by | Decomposing | 245 ± 33.3 | 42 = 22 + 15 + 5                   |
| <i>λtRI</i>     | Stand-by | Decomposing | 160 ± 44.8 | 33 = 13 + 7 + 5 + 8                |

## (2-2) Recycling termination timing in stand-by assay

| Terminator      | Assay    | Pathway   | Timing (s)     | <i>n</i> in replicated experiments |
|-----------------|----------|-----------|----------------|------------------------------------|
| <i>mgtA</i>     | Stand-by | Recycling | Not measurable | 0 = 0 + 0 + 0 + 1                  |
| <i>mgtA+Nus</i> | Stand-by | Recycling | Not measurable | 0 = 0 + 0 + 0 + 0                  |
| <i>rho</i>      | Stand-by | Recycling | Not measurable | 0 = 0 + 0 + 0                      |
| <i>ribB</i>     | Stand-by | Recycling | Not measurable | 0 = 0 + 0 + 0                      |
| <i>trp-t'</i>   | Stand-by | Recycling | Not measurable | 2 = 1 + 0 + 1                      |
| <i>λtRI</i>     | Stand-by | Recycling | Not measurable | 0 = 0 + 0 + 0 + 0                  |

## (2-3) Readthrough timing in stand-by assay

| Terminator      | Assay    | Pathway     | Timing (s) | <i>n</i> in replicated experiments |
|-----------------|----------|-------------|------------|------------------------------------|
| <i>mgtA</i>     | Stand-by | Readthrough | 137 ± 3.3  | 326 = 71 + 57 + 61 + 137           |
| <i>mgtA+Nus</i> | Stand-by | Readthrough | 132 ± 14.3 | 450 = 89 + 126 + 98 + 137          |
| <i>rho</i>      | Stand-by | Readthrough | 91 ± 10.0  | 184 = 47 + 82 + 55                 |
| <i>ribB</i>     | Stand-by | Readthrough | 113 ± 11.2 | 264 = 120 + 78 + 66                |
| <i>trp-t'</i>   | Stand-by | Readthrough | 78 ± 7.0   | 376 = 225 + 101 + 50               |
| <i>λtRI</i>     | Stand-by | Readthrough | 61 ± 4.9   | 389 = 154 + 79 + 60 + 96           |

## (3-1) Decomposing termination timing in catch-up assay

| Terminator      | Assay    | Pathway     | Timing (s) | <i>n</i> in replicated experiments |
|-----------------|----------|-------------|------------|------------------------------------|
| <i>mgtA</i>     | Catch-up | Decomposing | 189 ± 20.9 | 70 = 22 + 24 + 24                  |
| <i>mgtA+Nus</i> | Catch-up | Decomposing | 379 ± 37.2 | 95 = 26 + 27 + 18 + 24             |
| <i>rho</i>      | Catch-up | Decomposing | 246 ± 43.1 | 157 = 91 + 49 + 17                 |
| <i>ribB</i>     | Catch-up | Decomposing | 260 ± 26.2 | 49 = 16 + 10 + 23                  |
| <i>trp-t'</i>   | Catch-up | Decomposing | 209 ± 29.0 | 135 = 44 + 50 + 41                 |
| <i>λtRI</i>     | Catch-up | Decomposing | 132 ± 12.9 | 158 = 60 + 23 + 44 + 31            |

(3-2) Recycling termination timing in catch-up assay

| Terminator                     | Assay    | Pathway   | Timing (s)   | $n$ in replicated experiments |
|--------------------------------|----------|-----------|--------------|-------------------------------|
| <i>mgtA</i>                    | Catch-up | Recycling | $21 \pm 2.0$ | $14 = 6 + 7 + 1$              |
| <i>mgtA+Nus</i>                | Catch-up | Recycling | $26 \pm 2.1$ | $8 = 1 + 2 + 4 + 1$           |
| <i>rho</i>                     | Catch-up | Recycling | $27 \pm 1.5$ | $6 = 2 + 2 + 2$               |
| <i>ribB</i>                    | Catch-up | Recycling | $45 \pm 5.8$ | $6 = 1 + 3 + 2$               |
| <i>trp-t'</i>                  | Catch-up | Recycling | $13 \pm 0.4$ | $37 = 9 + 12 + 16$            |
| <i><math>\lambda</math>tRI</i> | Catch-up | Recycling | $23 \pm 0.6$ | $17 = 6 + 3 + 5 + 3$          |

(3-3) Readthrough timing in catch-up assay

| Terminator                     | Assay    | Pathway     | Timing (s)     | $n$ in replicated experiments |
|--------------------------------|----------|-------------|----------------|-------------------------------|
| <i>mgtA</i>                    | Catch-up | Readthrough | $177 \pm 8.8$  | $152 = 55 + 51 + 46$          |
| <i>mgtA+Nus</i>                | Catch-up | Readthrough | $167 \pm 11.9$ | $370 = 116 + 100 + 66 + 88$   |
| <i>rho</i>                     | Catch-up | Readthrough | $231 \pm 9.5$  | $302 = 163 + 95 + 44$         |
| <i>ribB</i>                    | Catch-up | Readthrough | $90 \pm 10.0$  | $250 = 76 + 66 + 108$         |
| <i>trp-t'</i>                  | Catch-up | Readthrough | $141 \pm 21.9$ | $240 = 77 + 88 + 75$          |
| <i><math>\lambda</math>tRI</i> | Catch-up | Readthrough | $112 \pm 15.9$ | $241 = 95 + 36 + 65 + 45$     |

**Supplementary Table 4 | Statistics for readthrough and termination timings (Fig. 3d)**

$n$  means the sample size.

$\sigma$  means standard deviation.

| Assay    | Pathway     | E[X]  | $\sigma$ | $n$ | $\sigma^2/\text{sqrt}(n)$ |
|----------|-------------|-------|----------|-----|---------------------------|
| Catch-up | Readthrough | 153.1 | 50.24    | 6   | 40.87                     |
| Catch-up | Decomposing | 235.7 | 83.46    | 6   | 1160.97                   |
| Catch-up | Recycling   | 25.8  | 10.71    | 6   | 19.11                     |
| Stand-by | Readthrough | 102.0 | 30.71    | 6   | 153.01                    |
| Stand-by | Decomposing | 301.7 | 30.30    | 6   | 3322.65                   |
